# Supplementary material
Source: Research Square preprint supplement (doi:10.21203/rs.3.rs-8829512/v1)

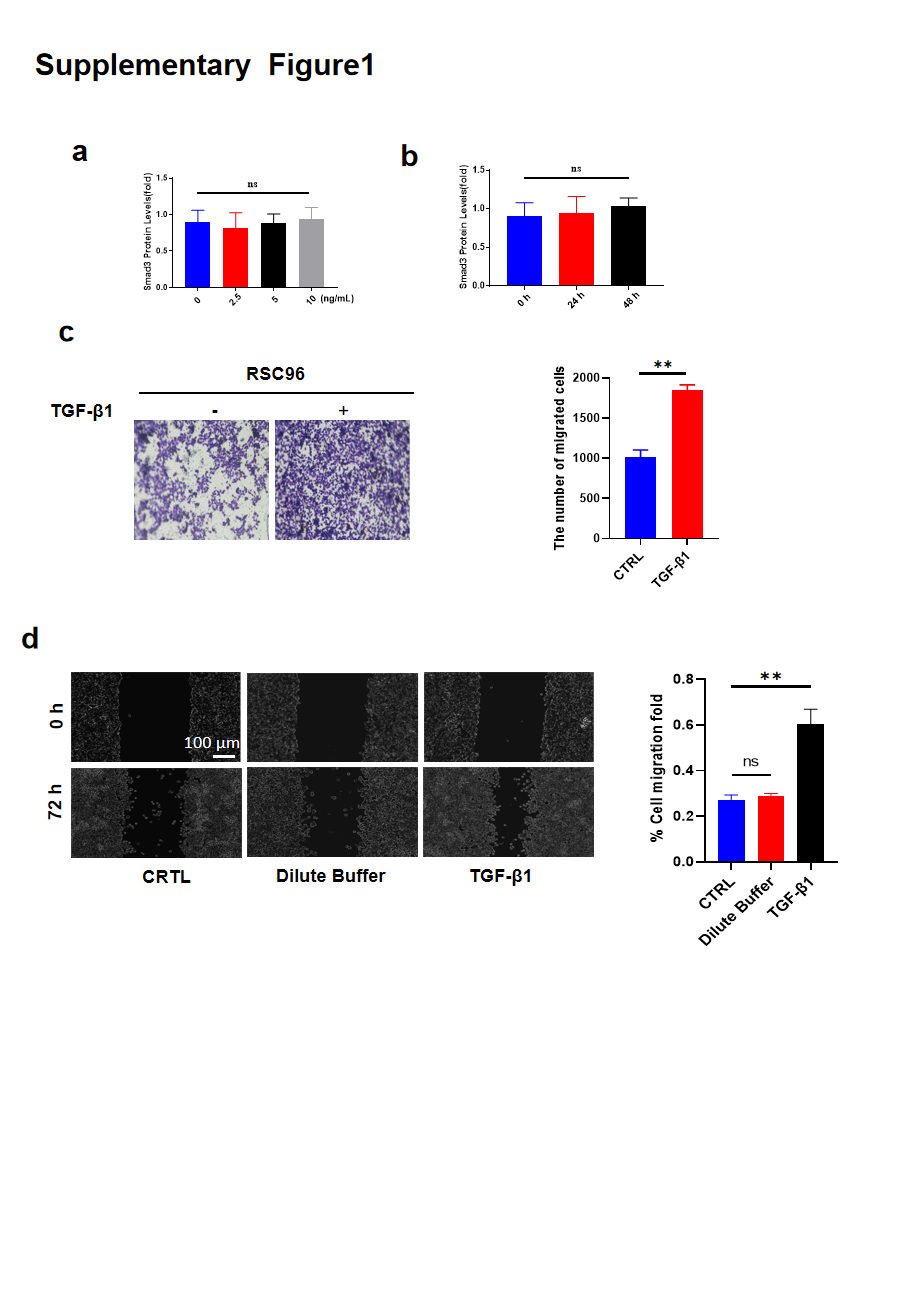

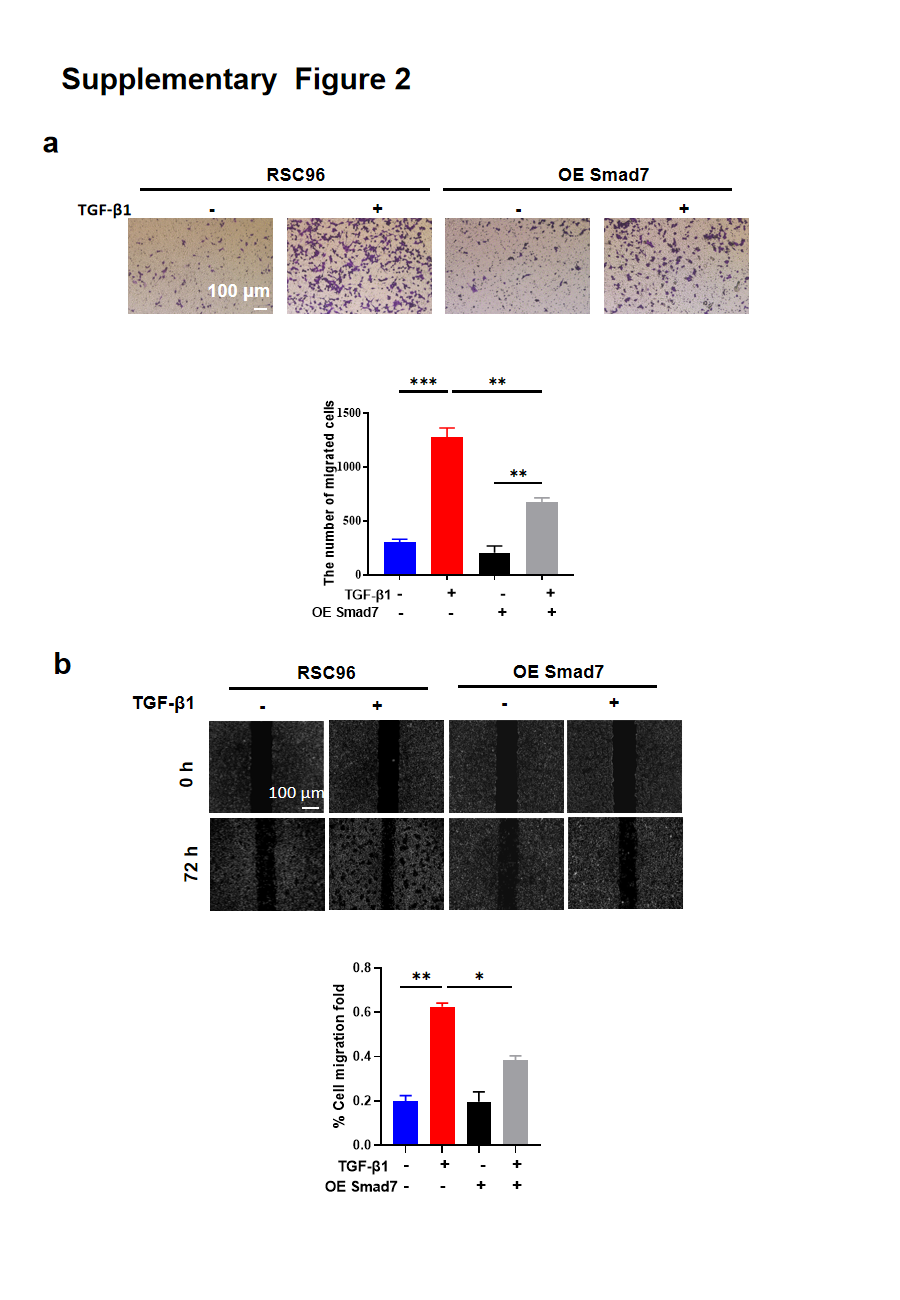

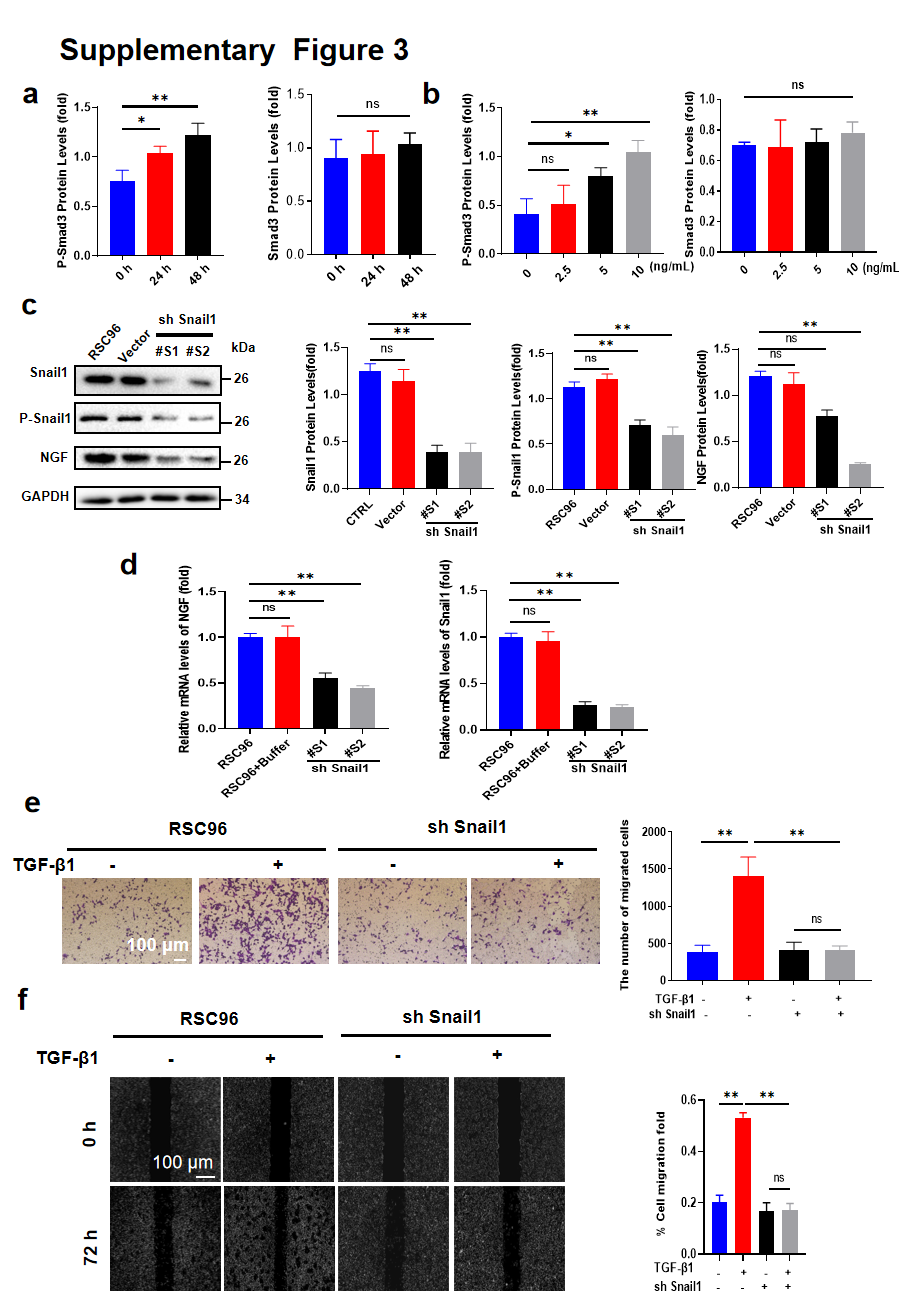

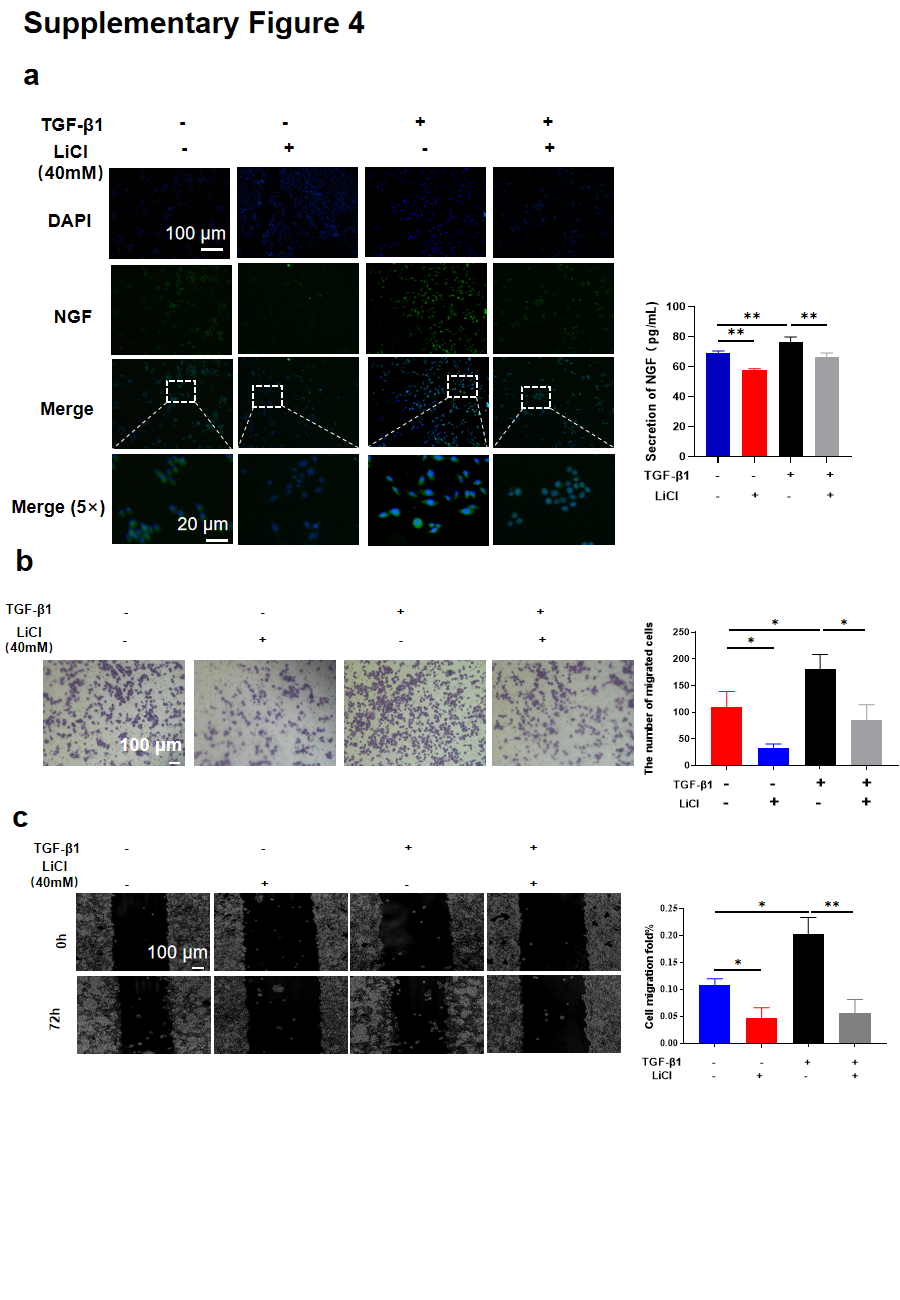

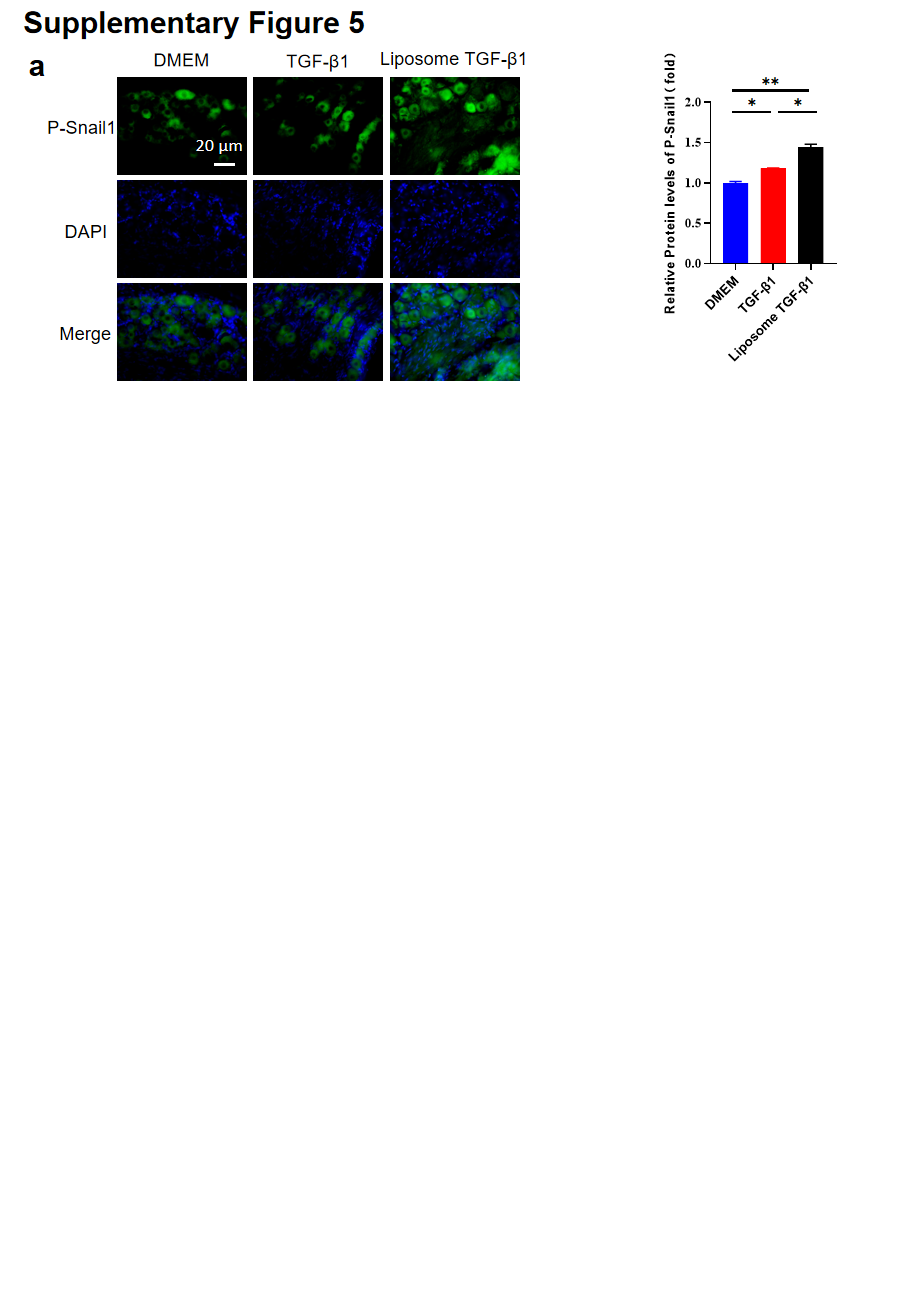

Supplement: Supplementary file 1 [file 0a7de419a7a508072a027aaa.docx]
